# Supplementary material for: Sources and Effects of Fluids in Continental Retrograde Shear Zones: Insights from the Kuckaus Mylonite Zone, Namibia
Source: Hindawi journal article supplement (doi:10.1155/2020/3023268), 2020-08-01
Supplement: f1 [file 3023268.f1.zip]

Archive with 2 entries (2 files):
- Stenvall_etal_Geofluids_supplements.pdf
- Table_S4_Stenvall_et_al_(2019)_Geofluids.xlsx
