# Supplementary material for: Sources and Effects of Fluids in Continental Retrograde Shear Zones: Insights from the Kuckaus Mylonite Zone, Namibia
Source: Hindawi journal article supplement (doi:10.1155/2020/3023268), 2020-08-01
Supplement: f1 [file 3023268.f1.zip › Stenvall_etal_Geofluids_supplements.pdf]

Supplementary Material for "Sources and effects of fluids  
in continental retrograde shear zones: Insights from the  
Kuckaus Mylonite Zone, Namibia"

C. A. Stenvall<sup>1</sup>, A. Fagereng<sup>1,2</sup>, J. F. A. Diener<sup>2</sup>, C. Harris<sup>2</sup> and P. E.  
Janney<sup>2</sup>

<sup>1</sup>School of Earth & Ocean Sciences, Cardiff University, Wales, United  
Kingdom

<sup>2</sup>Department of Geological Sciences, University of Cape Town, Private Bag  
X3, Rondebosch 7701, South Africa

March 5, 2020

## Contents of this file

1. Figure S1
2. Table S1 to S3

## Additional Supporting Information (File uploaded separately)

1. Caption for Table S4

**Introduction** Supporting information includes additional isocon graphs (Figure S1), a table of samples with  $\delta^{18}\text{O}$ , aluminium saturation index, and rocktype (Table S1), a table of bulk rock major- and trace element compositions (Table S2) and a table of changes in element concentrations and mass (Table S3). An additional table to support Figure 11 is provided as a .xlsx file (Table S4).

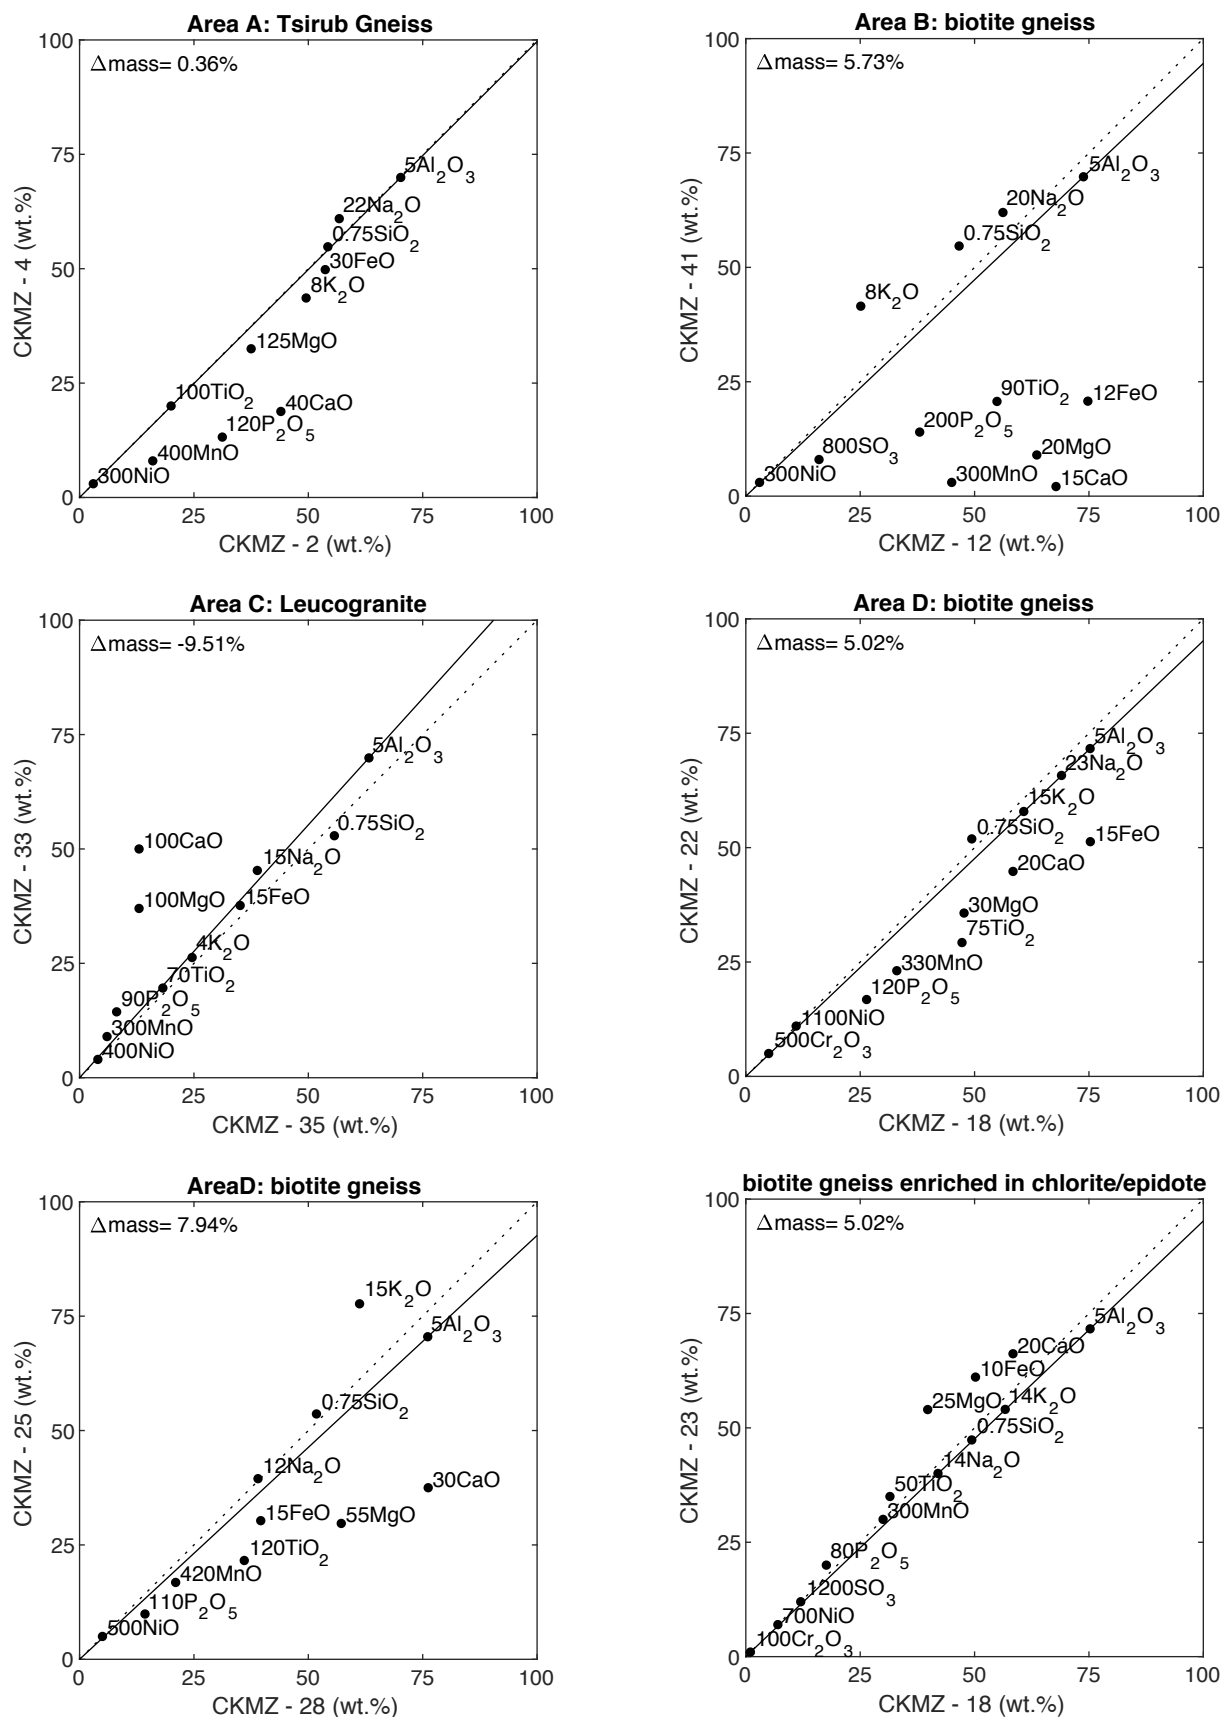

Figure S1: Additional isocon graphs.

Table S1

| <b>Whole rock oxygen isotope compositions</b> |             |            |                                             |                  |                       |                                    |
|-----------------------------------------------|-------------|------------|---------------------------------------------|------------------|-----------------------|------------------------------------|
| <b>CKMZ</b>                                   | <b>Area</b> | <b>ASI</b> | <b><math>\delta^{18}\text{O}</math> (‰)</b> | <b>Protolith</b> | <b>Description</b>    | <b>Latitude (S), Longitude (E)</b> |
| 2                                             | A           | 1.08       | 9.8                                         | Tsirub Gneiss    | Migmatitic            | 026°48'05.8", 015°57'21.0"         |
| 3                                             | A           | 1.22       | 9.6                                         | Tsirub Gneiss    | Protomylonite         | 026°48'06.6", 015°57'20.3"         |
| 4                                             | A           | 1.24       | 8.9                                         | Tsirub Gneiss    | Ultramylonite         | 026°48'07.1", 015°57'20.2"         |
| 5                                             | A           | 1.21       | 8.3                                         | Leucogranite     | Brittle deformation   | 026°48'06.9", 015°57'19.3"         |
| 7                                             | A           | 1.14       | 5.4                                         | Leucogranite     | Brittle deformation   | 026°48'07.0", 015°57'19.1"         |
| 8                                             | A           | 1.06       | 8.4                                         | Leucogranite     | Mylonite              | 026°48'06.4", 015°57'17.7"         |
| 9                                             | A           | 0.93       | 9.0                                         | biotite gneiss   | Protomylonite (green) | 026°48'06.7", 015°57'17.7"         |
| 10                                            | A           | 1.10       | 10.0                                        | biotite gneiss   | Ultramylonite         | 026°48'06.7", 015°57'17.9"         |
| 11                                            | A           | 1.15       | 8.8                                         | biotite gneiss   | Protomylonite (pink)  | 026°48'07.0", 015°57'18.3"         |
| 12                                            | A           | 0.91       | 9.0                                         | biotite gneiss   | Migmatitic            | 026°48'06.9", 015°57'16.4"         |
| 39                                            | B           | 1.17       | 9.3                                         | biotite gneiss   | Protomylonite         | 026°48'29.4", 015°57'48.1"         |
| 40                                            | B           | 1.11       | 8.2                                         | biotite gneiss   | Mylonite              | 026°48'29.7", 015°57'48.9"         |
| 41                                            | B           | 1.27       | 8.8                                         | biotite gneiss   | Ultramylonite         | 026°48'28.5", 015°57'48.7"         |
| 42                                            | B           | 1.30       | 9.3                                         | Leucogranite     | Ultramylonite         | 026°48'28.4", 015°57'48.7"         |
| 43                                            | B           | 1.11       | 8.5                                         | Leucogranite     | Mylonite              | 026°48'28.6", 015°57'49.0"         |
| 44                                            | B           | 1.24       | 10.6                                        | Leucogranite     | Protomylonite         | 026°48'28.4", 015°57'49.0"         |
| 46                                            | B           | 1.11       | 7.1                                         | biotite gneiss   | Mylonite (pink)       | 026°48'29.7", 015°57'50.0"         |
| 47                                            | B           | 1.53       | 11.5                                        | Leucogranite     | Undeformed            | 026°48'26.3", 015°57'52.4"         |
| 31                                            | C           | 1.17       | 13.1                                        | Tsirub Gneiss    | Protomylonite         | 026°48'32.4", 015°58'04.3"         |
| 32                                            | C           | 1.15       | 11.5                                        | Tsirub Gneiss    | Mylonite              | 026°48'32.4", 015°58'04.3"         |
| 33                                            | C           | 1.08       | 11.8                                        | Leucogranite     | Ultramylonite         | 026°48'32.4", 015°58'04.3"         |
| 34                                            | C           | 1.17       | 12.1                                        | Leucogranite     | Mylonite              | 026°48'32.4", 015°58'04.3"         |
| 35                                            | C           | 1.13       | 12.6                                        | Leucogranite     | Protomylonite         | 026°48'32.4", 015°58'04.3"         |
| 18                                            | D           | 1.03       | 8.6                                         | biotite gneiss   | Migmatitic            | 026°49'12.4", 015°58'30.0"         |
| 19                                            | D           | 1.07       | 7.7                                         | biotite gneiss   | Migmatitic            | 026°49'12.4", 015°58'30.0"         |
| 20                                            | D           | 1.06       | 8.8                                         | biotite gneiss   | Protomylonite         | 026°49'12.4", 015°58'30.0"         |
| 21                                            | D           | 1.09       | 9.2                                         | biotite gneiss   | Protomylonite         | 026°49'12.5", 015°58'29.9"         |
| 22                                            | D           | 1.11       | 9.3                                         | biotite gneiss   | Protomylonite         | 026°49'12.5", 015°58'29.9"         |
| 23                                            | D           | 1.08       | 9.4                                         | biotite gneiss   | Mylonite (green)      | 026°49'12.5", 015°58'29.9"         |
| 24                                            | D           | 1.03       | 9.4                                         | biotite gneiss   | Ultramylonite         | 026°49'12.5", 015°58'29.9"         |
| 25                                            | D           | 1.06       | 9.5                                         | biotite gneiss   | Ultramylonite         | 026°49'12.5", 015°58'29.9"         |
| 26                                            | D           | 1.08       | 9.3                                         | biotite gneiss   | Ultramylonite         | 026°49'12.5", 015°58'29.9"         |
| 27                                            | D           | 1.09       | 10.0                                        | biotite gneiss   | Mylonite              | 026°49'12.5", 015°58'29.9"         |
| 28                                            | D           | 1.06       | 9.0                                         | biotite gneiss   | Migmatitic            | 026°49'12.6", 015°58'29.9"         |
| 29                                            | D           | 1.08       | 9.9                                         | biotite gneiss   | Protomylonite         | 026°49'12.6", 015°58'29.9"         |

  

| <b>Quartz oxygen isotope compositions</b> |             |                                             |                  |                    |                                    |
|-------------------------------------------|-------------|---------------------------------------------|------------------|--------------------|------------------------------------|
| <b>CKMZ</b>                               | <b>Area</b> | <b><math>\delta^{18}\text{O}</math> (‰)</b> | <b>Host rock</b> | <b>Description</b> | <b>Latitude (S), Longitude (E)</b> |
| 6                                         | A           | -1.2                                        | Leucogranite     | Quartz vein        | 026°48'07.2", 015°57'19.1"         |
| 13                                        | -           | 11.6                                        | Leucogranite     | Quartz vein        | 026°48'55.5", 015°58'33.9"         |
| 38                                        | B           | 4.2                                         | biotite gneiss   | Quartz vein        | 026°48'29.4", 015°57'48.1"         |
| 45                                        | B           | 8.4                                         | biotite gneiss   | Quartz vein        | 026°48'29.7", 015°57'50.0"         |
| 36                                        | C           | 9.8                                         | Tsirub Gneiss    | Quartz vein        | 026°48'32.4", 015°58'04.3"         |
| 20                                        | D           | 9.0                                         | biotite gneiss   | Quartz vein        | 026°49'12.4", 015°58'30.0"         |
| 30                                        | D           | 10.3                                        | biotite gneiss   | Quartz vein        | 026°48'58.9", 015°58'32.3"         |
| 48                                        | -           | 11.2                                        | Tsirub Gneiss    | Quartz vein        | 026°48'23.2", 015°57'57.9"         |
| 49                                        | D           | 9.0                                         | biotite gneiss   | Quartz vein        | 026°48'23.2", 015°57'57.9"         |

**Table S2**

| Area<br>Sample<br>(wt. %)      | A     | 3     | 4     | 5     | 7     | 8     | 9     | 10    | 11    | 12    |
|--------------------------------|-------|-------|-------|-------|-------|-------|-------|-------|-------|-------|
| SiO <sub>2</sub>               | 72.35 | 74.38 | 73.06 | 77.25 | 75.01 | 72.85 | 63.64 | 70.98 | 73.57 | 62.16 |
| TiO <sub>2</sub>               | 0.20  | 0.13  | 0.20  | 0.05  | 0.07  | 0.05  | 0.63  | 0.28  | 0.11  | 0.61  |
| Al <sub>2</sub> O <sub>3</sub> | 14.04 | 13.90 | 13.99 | 12.53 | 12.83 | 15.04 | 14.55 | 13.92 | 13.81 | 14.76 |
| Fe <sub>2</sub> O <sub>3</sub> | 1.79  | 1.31  | 1.66  | 0.76  | 0.78  | 0.77  | 5.18  | 2.39  | 0.78  | 6.23  |
| MnO                            | 0.04  | 0.03  | 0.02  | 0.03  | 0.01  | 0.01  | 0.15  | 0.02  | 0.01  | 0.15  |
| MgO                            | 0.30  | 0.25  | 0.26  | 0.07  | 0.15  | -0.02 | 2.84  | 0.35  | 0.19  | 3.18  |
| CaO                            | 1.10  | 0.66  | 0.47  | 0.09  | 0.06  | 0.09  | 3.96  | 0.85  | 0.17  | 4.52  |
| Na <sub>2</sub> O              | 2.58  | 3.37  | 2.77  | 2.84  | 0.28  | 6.49  | 2.76  | 2.44  | 2.24  | 2.81  |
| K <sub>2</sub> O               | 6.19  | 4.29  | 5.45  | 5.07  | 9.92  | 3.08  | 3.68  | 6.51  | 7.46  | 3.14  |
| P <sub>2</sub> O <sub>5</sub>  | 0.26  | 0.11  | 0.11  | 0.05  | 0.02  | 0.02  | 0.23  | 0.10  | 0.03  | 0.19  |
| SO <sub>3</sub>                | -     | -     | -     | -     | -     | -     | 0.01  | -     | -     | 0.02  |
| Cr <sub>2</sub> O <sub>3</sub> | -     | -     | -     | -     | -     | -     | 0.02  | -     | 0.02  | 0.01  |
| NiO                            | 0.01  | 0.01  | 0.01  | 0.01  | 0.01  | 0.01  | 0.02  | 0.01  | 0.03  | 0.01  |
| H <sub>2</sub> O <sup>-</sup>  | 0.20  | 0.23  | 0.31  | 0.15  | 0.15  | 0.22  | 0.12  | 0.19  | 0.05  | 0.08  |
| LOI                            | 0.62  | 0.84  | 1.09  | 0.54  | 0.60  | 0.43  | 1.34  | 0.90  | 0.62  | 1.17  |
| Total                          | 99.67 | 99.52 | 99.41 | 99.45 | 99.90 | 99.04 | 99.12 | 98.95 | 99.08 | 99.04 |
| (ppm)                          |       |       |       |       |       |       |       |       |       |       |
| Zn                             | 38    |       | 25    |       |       |       |       | 20    |       | 68    |
| Cu                             | <5    |       | <5    |       |       |       |       | 16    |       | <5    |
| Ni                             | <5    |       | <5    |       |       |       |       | <5    |       | 14    |
| Mo                             | <5    |       | <5    |       |       |       |       | <5    |       | <5    |
| Nb                             | 11    |       | 12    |       |       |       |       | 12    |       | 17    |
| Zr                             | 125   |       | 151   |       |       |       |       | 274   |       | 182   |
| Y                              | 17    |       | 53    |       |       |       |       | 10    |       | 51    |
| Sr                             | 125   |       | 143   |       |       |       |       | 244   |       | 406   |
| Rb                             | 225   |       | 183   |       |       |       |       | 181   |       | 112   |
| U                              | <5    |       | <5    |       |       |       |       | <5    |       | <5    |
| Th                             | 15    |       | 37    |       |       |       |       | 41    |       | 12    |
| Pb                             | 40    |       | 42    |       |       |       |       | 42    |       | 17    |
| Co                             | <5    |       | <5    |       |       |       |       | <5    |       | 18    |
| Mn                             | 270   |       | 185   |       |       |       |       | 185   |       | 1237  |
| Cr                             | 18    |       | 16    |       |       |       |       | 15    |       | 90    |
| V                              | 24    |       | 19    |       |       |       |       | 34    |       | 120   |
| F                              | 393   |       | 362   |       |       |       |       | 314   |       | 881   |
| S                              | 289   |       | 358   |       |       |       |       | 275   |       | 367   |
| Cl                             | 142   |       | 107   |       |       |       |       | 112   |       | 168   |
| Sc                             | 5     |       | 6     |       |       |       |       | 5     |       | 20    |
| Ba                             | 598   |       | 597   |       |       |       |       | 1291  |       | 950   |

**Table S2 (cont.)**

| Area<br>Sample<br>(wt. %)      | B<br>39 | 39    | 40    | 41    | 42    | 43    | 44    | 46    | 47    |
|--------------------------------|---------|-------|-------|-------|-------|-------|-------|-------|-------|
| SiO <sub>2</sub>               | 88.78   | 88.75 | 71.70 | 72.89 | 72.21 | 76.30 | 77.34 | 71.34 | 79.80 |
| TiO <sub>2</sub>               | 0.14    | 0.13  | 0.29  | 0.23  | 0.28  | 0.14  | 0.13  | 0.07  | 0.30  |
| Al <sub>2</sub> O <sub>3</sub> | 4.84    | 4.56  | 13.80 | 13.96 | 14.18 | 11.78 | 11.33 | 15.22 | 9.12  |
| Fe <sub>2</sub> O <sub>3</sub> | 1.43    | 1.34  | 2.36  | 1.73  | 2.28  | 1.22  | 1.62  | 0.61  | 2.56  |
| MnO                            | 0.02    | 0.02  | 0.03  | 0.01  | 0.02  | 0.02  | 0.02  | 0.03  | 0.03  |
| MgO                            | 0.18    | 0.20  | 0.55  | 0.34  | 0.45  | 0.37  | 0.28  | 0.24  | 0.41  |
| CaO                            | 0.15    | 0.15  | 0.31  | 0.14  | 0.10  | 0.24  | 0.10  | 0.11  | 0.14  |
| Na <sub>2</sub> O              | 0.75    | 0.76  | 3.24  | 3.10  | 3.47  | 2.01  | 0.97  | 3.33  | 0.25  |
| K <sub>2</sub> O               | 2.35    | 2.21  | 6.05  | 5.19  | 4.61  | 6.32  | 6.79  | 7.44  | 4.90  |
| P <sub>2</sub> O <sub>5</sub>  | 0.07    | 0.07  | 0.10  | 0.07  | 0.04  | 0.18  | 0.10  | 0.04  | 0.15  |
| SO <sub>3</sub>                | 0.02    | 0.00  | 0.00  | 0.01  | 0.01  | 0.00  | 0.00  | 0.00  | 0.00  |
| Cr <sub>2</sub> O <sub>3</sub> | 0.02    | 0.00  | 0.00  | 0.00  | 0.00  | 0.00  | 0.00  | 0.00  | 0.00  |
| NiO                            | 0.06    | 0.01  | 0.01  | 0.01  | 0.01  | 0.01  | 0.01  | 0.01  | 0.01  |
| H <sub>2</sub> O <sup>-</sup>  | 0.02    | 0.07  | 0.07  | 0.12  | 0.17  | 0.06  | 0.08  | 0.08  | 0.10  |
| LOI                            | 0.53    | 0.58  | 0.73  | 1.38  | 1.40  | 0.66  | 0.79  | 0.58  | 1.15  |
| Total                          | 99.36   | 98.86 | 99.24 | 99.17 | 99.22 | 99.31 | 99.56 | 99.10 | 98.92 |
| (ppm)                          |         |       |       |       |       |       |       |       |       |
| Zn                             | 10      | 10    | 26    | 23    | 31    |       |       |       | 42    |
| Cu                             | 6       | 6     | <5    | <5    | <5    |       |       |       | <5    |
| Ni                             | <5      | <5    | <5    | <5    | <5    |       |       |       | <5    |
| Mo                             | <5      | <5    | <5    | <5    | <5    |       |       |       | <5    |
| Nb                             | <5      | <5    | 13    | 15    | 16    |       |       |       | 18    |
| Zr                             | 123     | 123   | 278   | 177   | 240   |       |       |       | 151   |
| Y                              | 8       | 8     | 35    | 39    | 37    |       |       |       | 12    |
| Sr                             | 46      | 46    | 126   | 89    | 87    |       |       |       | 59    |
| Rb                             | 73      | 73    | 175   | 250   | 237   |       |       |       | 248   |
| U                              | <5      | <5    | 8     | <5    | 5     |       |       |       | <5    |
| Th                             | <5      | <5    | 86    | 42    | 55    |       |       |       | 22    |
| Pb                             | 16      | 16    | 47    | 27    | 30    |       |       |       | 26    |
| Co                             | <5      | <5    | <5    | <5    | <5    |       |       |       | <5    |
| Mn                             | 160     | 160   | 246   | 78    | 114   |       |       |       | 249   |
| Cr                             | 39      | 39    | 13    | 10    | 13    |       |       |       | 32    |
| V                              | 19      | 19    | 30    | 27    | 34    |       |       |       | 23    |
| F                              | 395     | 395   | 369   | 358   | 361   |       |       |       | 465   |
| S                              | 411     | 411   | 267   | 459   | 308   |       |       |       | 276   |
| Cl                             | 230     | 230   | 105   | 100   | 97    |       |       |       | 93    |
| Sc                             | 5       | 5     | 6     | 5     | 6     |       |       |       | <5    |
| Ba                             | 383     | 383   | 751   | 546   | 638   |       |       |       | 519   |

**Table S2 (cont.)**

| Area<br>Sample<br>(wt.%)       | C<br>31 | 32    | 33    | 34    | 35    |
|--------------------------------|---------|-------|-------|-------|-------|
| SiO <sub>2</sub>               | 66.36   | 71.58 | 70.52 | 72.25 | 74.25 |
| TiO <sub>2</sub>               | 0.54    | 0.34  | 0.28  | 0.27  | 0.26  |
| Al <sub>2</sub> O <sub>3</sub> | 15.03   | 13.53 | 13.98 | 13.59 | 12.65 |
| Fe <sub>2</sub> O <sub>3</sub> | 4.15    | 2.69  | 2.51  | 2.05  | 2.34  |
| MnO                            | 0.07    | 0.05  | 0.03  | 0.02  | 0.02  |
| MgO                            | 1.11    | 0.63  | 0.37  | 0.38  | 0.13  |
| CaO                            | 1.51    | 0.45  | 0.50  | 0.38  | 0.13  |
| Na <sub>2</sub> O              | 2.75    | 3.24  | 3.02  | 3.02  | 2.59  |
| K <sub>2</sub> O               | 5.13    | 5.22  | 6.57  | 5.51  | 6.15  |
| P <sub>2</sub> O <sub>5</sub>  | 0.28    | 0.07  | 0.16  | 0.08  | 0.09  |
| SO <sub>3</sub>                | 0.00    | 0.01  | 0.00  | 0.00  | 0.00  |
| Cr <sub>2</sub> O <sub>3</sub> | 0.02    | 0.00  | -     | -     | 0.00  |
| NiO                            | 0.02    | 0.01  | 0.01  | 0.01  | 0.01  |
| H <sub>2</sub> O <sup>-</sup>  | 0.19    | 0.18  | 0.12  | 0.24  | 0.12  |
| LOI                            | 1.79    | 1.29  | 0.81  | 1.08  | 0.76  |
| Total                          | 98.95   | 99.29 | 98.89 | 98.89 | 99.50 |
| (ppm)                          |         |       |       |       |       |
| Zn                             | 55      |       | 28    |       | 12    |
| Cu                             | 19      |       | <5    |       | <5    |
| Ni                             | 5       |       | <5    |       | <5    |
| Mo                             | <5      |       | <5    |       | <5    |
| Nb                             | 29      |       | 12    |       | 16    |
| Zr                             | 191     |       | 310   |       | 134   |
| Y                              | 29      |       | 29    |       | 15    |
| Sr                             | 161     |       | 125   |       | 69    |
| Rb                             | 202     |       | 219   |       | 220   |
| U                              | <5      |       | <5    |       | <5    |
| Th                             | 10      |       | 67    |       | 25    |
| Pb                             | 31      |       | 38    |       | 31    |
| Co                             | <5      |       | <5    |       | <5    |
| Mn                             | 587     |       | 206   |       | 116   |
| Cr                             | 53      |       | 10    |       | 17    |
| V                              | 55      |       | 27    |       | 29    |
| F                              | 661     |       | 385   |       | 353   |
| S                              | 329     |       | 276   |       | 326   |
| Cl                             | 138     |       | 104   |       | 122   |
| Sc                             | 12      |       | 5     |       | 5     |
| Ba                             | 742     |       | 899   |       | 780   |

**Table S2 (cont.)**

| Area<br>Sample<br>(wt.%)       | D<br>18 | 19    | 20    | 21    | 22    | 23    | 24    | 25    | 26    | 27    | 28    | 29    |
|--------------------------------|---------|-------|-------|-------|-------|-------|-------|-------|-------|-------|-------|-------|
| SiO <sub>2</sub>               | 65.85   | 68.17 | 69.10 | 61.98 | 69.21 | 63.15 | 68.44 | 71.50 | 70.54 | 70.41 | 69.04 | 68.40 |
| TiO <sub>2</sub>               | 0.63    | 0.39  | 0.29  | 0.89  | 0.39  | 0.70  | 0.40  | 0.18  | 0.18  | 0.34  | 0.30  | 0.28  |
| Al <sub>2</sub> O <sub>3</sub> | 15.05   | 14.67 | 15.00 | 14.83 | 14.33 | 15.49 | 14.58 | 14.10 | 14.72 | 14.10 | 15.22 | 15.12 |
| Fe <sub>2</sub> O <sub>3</sub> | 5.02    | 3.59  | 2.95  | 7.79  | 3.42  | 6.11  | 3.61  | 2.02  | 2.03  | 3.00  | 2.64  | 2.42  |
| MnO                            | 0.10    | 0.07  | 0.05  | 0.12  | 0.07  | 0.10  | 0.07  | 0.04  | 0.04  | 0.06  | 0.05  | 0.05  |
| MgO                            | 1.59    | 1.45  | 1.01  | 2.32  | 1.19  | 2.16  | 1.23  | 0.54  | 0.56  | 1.14  | 1.04  | 0.85  |
| CaO                            | 2.92    | 2.20  | 2.74  | 2.45  | 2.24  | 3.31  | 2.17  | 1.25  | 1.26  | 2.22  | 2.54  | 1.16  |
| Na <sub>2</sub> O              | 3.00    | 3.19  | 3.29  | 2.62  | 2.86  | 3.30  | 4.66  | 3.29  | 3.31  | 2.96  | 3.25  | 2.50  |
| K <sub>2</sub> O               | 4.05    | 4.13  | 3.47  | 4.49  | 3.86  | 2.69  | 2.36  | 5.18  | 5.51  | 3.75  | 4.08  | 7.22  |
| P <sub>2</sub> O <sub>5</sub>  | 0.22    | 0.14  | 0.13  | 0.13  | 0.14  | 0.25  | 0.18  | 0.09  | 0.09  | 0.13  | 0.13  | 0.15  |
| SO <sub>3</sub>                | 0.01    | 0.00  | 0.01  | 0.01  | 0.00  | 0.01  | 0.00  | 0.00  | 0.00  | 0.00  | 0.01  | -     |
| Cr <sub>2</sub> O <sub>3</sub> | 0.01    | 0.01  | 0.00  | 0.02  | 0.01  | 0.01  | 0.03  | 0.00  | 0.00  | 0.01  | -     | 0.00  |
| NiO                            | 0.01    | 0.01  | 0.01  | 0.01  | 0.01  | 0.01  | 0.01  | 0.01  | 0.01  | 0.01  | 0.01  | 0.01  |
| H <sub>2</sub> O <sup>-</sup>  | 0.10    | 0.09  | 0.09  | 0.12  | 0.10  | 0.14  | 0.12  | 0.10  | 0.12  | 0.12  | 0.09  | 0.12  |
| LOI                            | 0.77    | 1.24  | 1.01  | 1.56  | 1.06  | 1.68  | 1.21  | 0.76  | 0.83  | 1.11  | 1.07  | 0.97  |
| Total                          | 99.34   | 99.35 | 99.15 | 99.34 | 98.90 | 99.11 | 99.06 | 99.04 | 99.20 | 99.36 | 99.46 | 99.24 |
| (ppm)                          |         |       |       |       |       |       |       |       |       |       |       |       |
| Zn                             | 59      |       |       |       |       |       | 41    |       |       |       | 34    |       |
| Cu                             | 37      |       |       |       |       |       | 5     |       |       |       | <5    |       |
| Ni                             | 14      |       |       |       |       |       | <5    |       |       |       | <5    |       |
| Mo                             | <5      |       |       |       |       |       | <5    |       |       |       | <5    |       |
| Nb                             | 22      |       |       |       |       |       | 11    |       |       |       | 8     |       |
| Zr                             | 151     |       |       |       |       |       | 149   |       |       |       | 126   |       |
| Y                              | 54      |       |       |       |       |       | 16    |       |       |       | 7     |       |
| Sr                             | 372     |       |       |       |       |       | 297   |       |       |       | 414   |       |
| Rb                             | 176     |       |       |       |       |       | 115   |       |       |       | 152   |       |
| U                              | <5      |       |       |       |       |       | <5    |       |       |       | <5    |       |
| Th                             | 17      |       |       |       |       |       | 11    |       |       |       | 8     |       |
| Pb                             | 17      |       |       |       |       |       | 12    |       |       |       | 17    |       |
| Co                             | 10      |       |       |       |       |       | 5     |       |       |       | <5    |       |
| Mn                             | 812     |       |       |       |       |       | 543   |       |       |       | 399   |       |
| Cr                             | 48      |       |       |       |       |       | 36    |       |       |       | 27    |       |
| V                              | 91      |       |       |       |       |       | 54    |       |       |       | 59    |       |
| F                              | 761     |       |       |       |       |       | 452   |       |       |       | 428   |       |
| S                              | 322     |       |       |       |       |       | 281   |       |       |       | 282   |       |
| Cl                             | 137     |       |       |       |       |       | 112   |       |       |       | 113   |       |
| Sc                             | 11      |       |       |       |       |       | 8     |       |       |       | <5    |       |
| Ba                             | 1195    |       |       |       |       |       | 684   |       |       |       | 1355  |       |

**Table S3**

**Area A** Absolute change in concentration (%) (after Spruzeniece and Piazzolo, 2015)

| Sample                         | Against 2 |       | Against 47 |       |        | Against 12 |       |       |
|--------------------------------|-----------|-------|------------|-------|--------|------------|-------|-------|
|                                | 3         | 4     | 5          | 7     | 8      | 9          | 10    | 11    |
| SiO <sub>2</sub>               | 3.8       | 1.3   | -29.5      | -33.2 | -44.6  | 3.8        | 21.0  | 26.5  |
| TiO <sub>2</sub>               | -32.3     | 0.2   | -88.5      | -82.3 | -89.2  | 4.9        | -51.0 | -80.2 |
| Al <sub>2</sub> O <sub>3</sub> |           |       |            |       |        |            |       |       |
| Fe <sub>2</sub> O <sub>3</sub> | -26.4     | -6.7  | -78.3      | -78.3 | -81.7  | -15.7      | -59.4 | -86.7 |
| MnO                            | -19.4     | -34.5 | -29.0      | -71.8 | -87.0  | 0.5        | -84.4 | -92.8 |
| MgO                            | -16.1     | -13.5 | -87.7      | -73.1 | -102.3 | -9.7       | -88.3 | -93.5 |
| CaO                            | -39.4     | -57.6 | -54.0      | -71.9 | -59.4  | -11.2      | -80.0 | -96.1 |
| Na <sub>2</sub> O              | 32.3      | 8.1   | 725.6      | -20.2 | 1468.5 | -0.3       | -7.9  | -15.0 |
| K <sub>2</sub> O               | -30.0     | -11.8 | -24.7      | 44.0  | -61.9  | 18.8       | 119.6 | 153.6 |
| P <sub>2</sub> O <sub>5</sub>  | -54.8     | -56.9 | -74.6      | -93.0 | -92.4  | 20.4       | -42.4 | -82.5 |
| SO <sub>3</sub>                |           |       |            |       |        | -62.0      |       |       |
| Cr <sub>2</sub> O <sub>3</sub> |           |       |            |       |        | 60.2       |       | 79.2  |
| NiO                            | -45.8     | -46.3 | -16.3      | -28.5 | -38.9  | 89.8       | -7.1  | 343.5 |
| H <sub>2</sub> O <sup>-</sup>  | 15.3      | 57.9  | 10.3       | 8.9   | 35.6   | 65.9       | 159.1 | -23.3 |
| LOI                            | 37.9      | 77.4  | -66.1      | -62.8 | -77.4  | 15.9       | -19.0 | -43.9 |
| Zn                             |           | -32.4 |            |       |        |            | -69.2 |       |
| Cu                             |           |       |            |       |        |            |       |       |
| Ni                             |           |       |            |       |        |            |       |       |
| Mo                             |           |       |            |       |        |            |       |       |
| Nb                             |           | 2.4   |            |       |        |            | -25.1 |       |
| Zr                             |           | 20.6  |            |       |        |            | 60.1  |       |
| Y                              |           | 220.1 |            |       |        |            | -80.0 |       |
| Sr                             |           | 15.0  |            |       |        |            | -36.4 |       |
| Rb                             |           | -18.5 |            |       |        |            | 72.4  |       |
| U                              |           |       |            |       |        |            |       |       |
| Th                             |           | 156.0 |            |       |        |            | 268.5 |       |
| Pb                             |           | 5.0   |            |       |        |            | 156.1 |       |
| Co                             |           |       |            |       |        |            |       |       |
| Mn                             |           | -31.4 |            |       |        |            | -84.1 |       |
| Cr                             |           | -15.6 |            |       |        |            | -82.4 |       |
| V                              |           | -20.6 |            |       |        |            | -69.5 |       |
| F                              |           | -7.6  |            |       |        |            | -62.2 |       |
| S                              |           | 24.5  |            |       |        |            | -20.6 |       |
| Cl                             |           | -24.3 |            |       |        |            | -29.1 |       |
| Sc                             |           | 23.5  |            |       |        |            | -74.9 |       |
| Ba                             |           | 0.2   |            |       |        |            | 44.0  |       |

Total mass change (%) (after Spruzeniece and Piazzolo, 2015)

| Sample          | 3   | 4   | 5     | 7     | 8     | 9   | 10  | 11  |
|-----------------|-----|-----|-------|-------|-------|-----|-----|-----|
| Mass change (%) | 1.0 | 0.3 | -27.2 | -28.9 | -39.4 | 1.4 | 6.0 | 6.9 |

**Table S3 (cont.)**

**Area B** Absolute change in concentration (%) (after Spruzeniece and Piazzolo, 2015)

| Sample                         | Against 12 |        |       | Against 47 |        |       |
|--------------------------------|------------|--------|-------|------------|--------|-------|
|                                | 40         | 46     | 41    | 42         | 43     | 44    |
| SiO <sub>2</sub>               | 23.4       | 11.3   | 24.0  | -41.8      | -26.0  | -22.0 |
| TiO <sub>2</sub>               | -48.1      | -88.4  | -59.2 | -39.7      | -62.7  | -64.0 |
| Al <sub>2</sub> O <sub>3</sub> |            |        |       |            |        |       |
| Fe <sub>2</sub> O <sub>3</sub> | -59.4      | -90.5  | -70.6 | -42.9      | -63.0  | -49.1 |
| MnO                            | -79.2      | -80.8  | -92.3 | -70.6      | -49.0  | -45.3 |
| MgO                            | -81.4      | -92.8  | -88.6 | -28.7      | -30.5  | -45.5 |
| CaO                            | -92.6      | -97.5  | -96.8 | -54.7      | 31.1   | -43.2 |
| Na <sub>2</sub> O              | 23.3       | 15.0   | 16.5  | 788.8      | 520.7  | 210.6 |
| K <sub>2</sub> O               | 105.8      | 129.4  | 74.6  | -39.5      | 0.0    | 11.7  |
| P <sub>2</sub> O <sub>5</sub>  | -42.9      | -78.5  | -63.4 | -82.2      | -9.9   | -46.4 |
| SO <sub>3</sub>                | -120.1     | -93.8  | -47.3 | 94.2       | -180.1 | -72.7 |
| Cr <sub>2</sub> O <sub>3</sub> | -91.1      | -108.3 | -82.4 | -83.8      | -80.0  | -59.0 |
| NiO                            | -6.0       | -25.4  | -21.0 | -35.3      | -19.9  | -6.3  |
| H <sub>2</sub> O <sup>-</sup>  | 1.5        | 6.5    | 62.8  | 11.2       | -51.5  | -34.8 |
| LOI                            | -33.8      | -52.0  | 24.3  | -21.4      | -55.7  | -44.7 |
| Zn                             | -58.3      |        | -64.8 | -51.6      |        |       |
| Cu                             |            |        |       |            |        |       |
| Ni                             |            |        |       |            |        |       |
| Mo                             |            |        |       |            |        |       |
| Nb                             | -16.0      |        | -4.9  | -40.7      |        |       |
| Zr                             | 63.7       |        | 2.7   | 2.1        |        |       |
| Y                              | -27.6      |        | -20.5 | 97.5       |        |       |
| Sr                             | -66.9      |        | -76.7 | -4.5       |        |       |
| Rb                             | 68.0       |        | 136.7 | -38.7      |        |       |
| U                              |            |        |       |            |        |       |
| Th                             | 688.2      |        | 280.7 | 64.2       |        |       |
| Pb                             | 188.2      |        | 66.3  | -25.7      |        |       |
| Co                             |            |        |       |            |        |       |
| Mn                             | -78.7      |        | -93.3 | -70.5      |        |       |
| Cr                             | -84.5      |        | -88.5 | -73.2      |        |       |
| V                              | -73.4      |        | -76.0 | -6.2       |        |       |
| F                              | -55.2      |        | -57.1 | -50.0      |        |       |
| S                              | -22.3      |        | 32.3  | -28.1      |        |       |
| Cl                             | -32.9      |        | -37.1 | -33.4      |        |       |
| Sc                             | -67.9      |        | -74.5 |            |        |       |
| Ba                             | -15.5      |        | -39.2 | -21.0      |        |       |

Total mass change (%) (after Spruzeniece and Piazzolo, 2015)

| Sample          | 40  | 46   | 41  |  | 42    | 43    | 44    |
|-----------------|-----|------|-----|--|-------|-------|-------|
| Mass change (%) | 6.9 | -3.0 | 5.7 |  | -35.7 | -22.6 | -19.5 |

**Table S3 (cont.)**

**Area C** Absolute change in concentration (%) (after Spruzeniece and Piazzolo, 2015)

| Sample                         | Against 31 |        | Against 35 |       |
|--------------------------------|------------|--------|------------|-------|
|                                | 32         | 33     | 33         | 34    |
| SiO <sub>2</sub>               | 19.9       | 14.2   | -14.1      | -9.4  |
| TiO <sub>2</sub>               | -29.1      | -42.9  | -2.9       | -5.3  |
| Al <sub>2</sub> O <sub>3</sub> |            |        |            |       |
| Fe <sub>2</sub> O <sub>3</sub> | -27.8      | -34.9  | -3.0       | -18.3 |
| MnO                            | -29.2      | -56.5  | 61.3       | 5.8   |
| MgO                            | -37.0      | -64.5  | 155.0      | 173.3 |
| CaO                            | -67.0      | -64.4  | 249.9      | 174.0 |
| Na <sub>2</sub> O              | 30.6       | 17.9   | 5.4        | 8.7   |
| K <sub>2</sub> O               | 13.3       | 37.8   | -3.5       | -16.6 |
| P <sub>2</sub> O <sub>5</sub>  | -72.2      | -37.2  | 60.3       | -17.2 |
| SO <sub>3</sub>                | 285.5      | -154.3 | -192.1     | 41.0  |
| Cr <sub>2</sub> O <sub>3</sub> | -87.0      |        |            |       |
| NiO                            | -41.3      | -49.3  | 7.5        | -6.0  |
| H <sub>2</sub> O <sup>-</sup>  | 0.9        | -33.7  | -8.1       | 86.2  |
| LOI                            | -19.9      | -51.0  | -2.5       | 33.4  |
| Zn                             |            | -45.5  | 115.6      |       |
| Cu                             |            |        |            |       |
| Ni                             |            |        |            |       |
| Mo                             |            |        |            |       |
| Nb                             |            | -53.7  | -30.9      |       |
| Zr                             |            | 74.8   | 110.0      |       |
| Y                              |            | 7.8    | 76.6       |       |
| Sr                             |            | -16.2  | 63.1       |       |
| Rb                             |            | 16.1   | -10.0      |       |
| U                              |            |        |            |       |
| Th                             |            | 630.6  | 142.7      |       |
| Pb                             |            | 29.9   | 12.1       |       |
| Co                             |            |        |            |       |
| Mn                             |            | -62.3  | 60.7       |       |
| Cr                             |            | -80.3  | -48.9      |       |
| V                              |            | -48.1  | -15.7      |       |
| F                              |            | -37.4  | -1.4       |       |
| S                              |            | -9.9   | -23.5      |       |
| Cl                             |            | -18.9  | -22.9      |       |
| Sc                             |            | -53.3  | 4.2        |       |
| Ba                             |            | 30.3   | 4.2        |       |

Total mass change (%) (after Spruzeniece and Piazzolo, 2015)

| Sample          | 32   | 33  |  | 33   | 34   |
|-----------------|------|-----|--|------|------|
| Mass change (%) | 11.1 | 7.5 |  | -9.6 | -6.9 |

**Table S3 (cont.)**

**Area D**

Absolute change in concentration (%) (after Spruzeniece and Piazzolo, 2015)

| Sample                         | Against 18 |       |       |       |       | Against 28 |       |       |       |       |
|--------------------------------|------------|-------|-------|-------|-------|------------|-------|-------|-------|-------|
|                                | 19         | 20    | 21    | 22    | 23    | 24         | 25    | 26    | 27    | 29    |
| SiO <sub>2</sub>               | 6.2        | 5.3   | -4.5  | 10.3  | -6.8  | 3.5        | 11.8  | 10.0  | 10.0  | -0.3  |
| TiO <sub>2</sub>               | -36.7      | -54.4 | 43.0  | -35.5 | 7.8   | 38.4       | -35.2 | 22.5  | 22.5  | -6.9  |
| Al <sub>2</sub> O <sub>3</sub> |            |       |       |       |       |            |       |       |       |       |
| Fe <sub>2</sub> O <sub>3</sub> | -26.6      | -41.1 | 57.4  | -28.5 | 18.2  | 42.8       | -17.5 | 22.7  | 22.7  | -7.7  |
| MnO                            | -26.0      | -45.6 | 18.1  | -23.5 | -1.4  | 47.6       | -22.2 | 40.3  | 40.3  | 0.7   |
| MgO                            | -6.4       | -36.3 | 48.4  | -21.0 | 31.9  | 24.2       | -44.0 | 18.3  | 18.3  | -17.5 |
| CaO                            | -22.5      | -5.7  | -14.9 | -19.3 | 10.3  | -11.0      | -46.9 | -5.9  | -5.9  | -54.2 |
| Na <sub>2</sub> O              | 9.2        | 9.9   | -11.4 | 0.2   | 6.9   | 49.8       | 9.3   | -1.6  | -1.6  | -22.7 |
| K <sub>2</sub> O               | 4.5        | -14.0 | 12.3  | 0.1   | -35.5 | -39.5      | 37.1  | -0.8  | -0.8  | 78.0  |
| P <sub>2</sub> O <sub>5</sub>  | -36.9      | -41.0 | -42.8 | -34.7 | 11.2  | 44.9       | -27.7 | 6.9   | 6.9   | 20.2  |
| SO <sub>3</sub>                | -59.2      | 20.7  | -9.5  | -89.6 | -51.7 | -120.5     | -36.0 | -79.0 | -79.0 |       |
| Cr <sub>2</sub> O <sub>3</sub> | -10.7      | -62.3 | 126.4 | -21.9 | -15.4 |            |       |       |       |       |
| NiO                            | -23.4      | -24.6 | -7.8  | -30.6 | -19.4 | 32.0       | 6.7   | 20.3  | 20.3  | 15.1  |
| H <sub>2</sub> O <sup>-</sup>  | -12.1      | -13.1 | 15.4  | -0.8  | 34.7  | 37.8       | 16.8  | 40.1  | 40.1  | 28.6  |
| LOI                            | 63.9       | 31.1  | 104.9 | 44.5  | 110.9 | 17.6       | -23.8 | 11.6  | 11.6  | -9.0  |
| Zn                             |            |       |       |       |       | 26.9       |       |       |       |       |
| Cu                             |            |       |       |       |       |            |       |       |       |       |
| Ni                             |            |       |       |       |       |            |       |       |       |       |
| Mo                             |            |       |       |       |       |            |       |       |       |       |
| Nb                             |            |       |       |       |       | 50.0       |       |       |       |       |
| Zr                             |            |       |       |       |       | 22.8       |       |       |       |       |
| Y                              |            |       |       |       |       | 151.4      |       |       |       |       |
| Sr                             |            |       |       |       |       | -25.1      |       |       |       |       |
| Rb                             |            |       |       |       |       | -21.1      |       |       |       |       |
| U                              |            |       |       |       |       |            |       |       |       |       |
| Th                             |            |       |       |       |       | 50.5       |       |       |       |       |
| Pb                             |            |       |       |       |       | -26.8      |       |       |       |       |
| Co                             |            |       |       |       |       |            |       |       |       |       |
| Mn                             |            |       |       |       |       | 41.9       |       |       |       |       |
| Cr                             |            |       |       |       |       | 39.7       |       |       |       |       |
| V                              |            |       |       |       |       | -3.7       |       |       |       |       |
| F                              |            |       |       |       |       | 10.2       |       |       |       |       |
| S                              |            |       |       |       |       | 4.0        |       |       |       |       |
| Cl                             |            |       |       |       |       | 3.8        |       |       |       |       |
| Sc                             |            |       |       |       |       |            |       |       |       |       |
| Ba                             |            |       |       |       |       | -47.4      |       |       |       |       |

Total mass change (%) (after Spruzeniece and Piazzolo, 2015)

| Sample          | 19  | 20  | 21  | 22  | 23   | 24  | 25  | 26  | 27  | 29  |
|-----------------|-----|-----|-----|-----|------|-----|-----|-----|-----|-----|
| Mass change (%) | 2.6 | 0.3 | 1.4 | 5.0 | -2.9 | 4.4 | 7.9 | 3.4 | 7.9 | 0.6 |

**Table S4** This table is available as a .xlsx file and contains para- and orthogneiss whole-rock  $\delta^{18}\text{O}$  values used for Figure 11 (Beckinsale, Evans, Thorpe, Gibbons, & Harmon, 1984; Cartwright & Barnicoat, 2003; Cartwright & Buick, 1999; Cartwright, Valley, & Hazelwood, 1993; Curtis, Harris, Trumbull, De Beer, & Mudzanani, 2013; Eiler & Valley, 1994; Fagereng, Harris, La Grange, & Stevens, 2008; Khan et al., 2019; Lackey, Valley, & Saleeby, 2005; Longstaffe & Schwarcz, 1977; McCaig, Wickham, & Taylor, 1990; Prame & Pohl, 1994; Prochaska, Bechtel, & Klötzli, 1992; Read & Cartwright, 2000; Rehman et al., 2014; Stenvall, Fagereng, & Diener, 2019).

## References

- Beckinsale, R., Evans, J., Thorpe, R., Gibbons, W., & Harmon, R. (1984). Rb-Sr whole-rock isochron ages,  $\delta^{18}\text{O}$  values and geochemical data for the Sarn Igneous Complex and the Parwyd gneisses of the Mona Complex of Llŷn, N Wales. *Journal of the Geological Society*, *141*(4), 701–709.
- Cartwright, I., & Barnicoat, A. C. (2003). Geochemical and stable isotope resetting in shear zones from Täschalp: constraints on fluid flow during exhumation in the Western Alps. *Journal of Metamorphic Geology*, *21*(2), 143–161.
- Cartwright, I., & Buick, I. S. (1999). The flow of surface-derived fluids through Alice Springs age middle-crustal ductile shear zones, Reynolds Range, central Australia. *Journal of Metamorphic Geology*, *17*(4), 397–414.
- Cartwright, I., Valley, J. W., & Hazelwood, A.-M. (1993). Resetting of oxybarometers and oxygen isotope ratios in granulite facies orthogneisses during cooling and shearing, Adirondack Mountains, New York. *Contributions to Mineralogy and Petrology*, *113*(2), 208–225.
- Curtis, C. G., Harris, C., Trumbull, R. B., De Beer, C., & Mudzanani, L. (2013). Oxygen isotope diversity in the anorogenic Koegel Fontein complex of South Africa: a case for basement control and selective melting for the production of low- $\delta^{18}\text{O}$  magmas. *Journal of Petrology*, *54*(7), 1259–1283.
- Eiler, J. M., & Valley, J. W. (1994). Preservation of premetamorphic oxygen isotope ratios in granitic orthogneiss from the Adirondack Mountains, New York, USA. *Geochimica*

- et Cosmochimica Acta*, 58(24), 5525–5535.
- Fagereng, Å., Harris, C., La Grange, M., & Stevens, G. (2008). Stable isotope study of the Archaean rocks of the Vredefort impact structure, central Kaapvaal Craton, South Africa. *Contributions to Mineralogy and Petrology*, 155(1), 63–78.
- Khan, T., Ahmad, A., Rehman, H. U., Chaudhry, M. N., Murata, M., & Zafar, M. (2019). Rb-Sr and Oxygen Isotope Study of the Swat Granite Gneisses (Pakistan): Implications for the Magmatic Source and Tectonic Setup. In *Petrogenesis and exploration of the earth's interior* (pp. 41–43). Springer.
- Lackey, J. S., Valley, J. W., & Saleeby, J. B. (2005). Supracrustal input to magmas in the deep crust of Sierra Nevada batholith: Evidence from high- $\delta^{18}\text{O}$  zircon. *Earth and Planetary Science Letters*, 235(1-2), 315–330.
- Longstaffe, F. J., & Schwarcz, H. P. (1977).  $^{18}\text{O}/^{16}\text{O}$  of Archean clastic metasedimentary rocks: a petrogenetic indicator for Archean gneisses? *Geochimica et Cosmochimica Acta*, 41(9), 1303–1312.
- McCaig, A. M., Wickham, S. M., & Taylor, H. P. (1990). Deep fluid circulation in alpine shear zones, Pyrenees, France: field and oxygen isotope studies. *Contributions to Mineralogy and Petrology*, 106(1), 41–60.
- Prame, W., & Pohl, J. (1994). Geochemistry of pelitic and psammopelitic Precambrian metasediments from southwestern Sri Lanka: implications for two contrasting source-terrains and tectonic settings. *Precambrian Research*, 66(1-4), 223–244.
- Prochaska, W., Bechtel, A., & Klötzli, U. (1992). Phyllonite formation and alteration of gneisses in shear zones (Gleinalmkristallin, Eastern Alps/Austria). *Mineralogy and Petrology*, 45(3-4), 195–216.
- Read, C., & Cartwright, I. (2000). Meteoric fluid infiltration in the middle crust during shearing: examples from the Arunta Inlier, central Australia. *Journal of Geochemical Exploration*, 69, 333–337.
- Rehman, H. U., Tanaka, R., O'Brien, P. J., Kobayashi, K., Tsujimori, T., Nakamura, E., . . . Kaneko, Y. (2014). Oxygen isotopes in Indian Plate eclogites (Kaghan Valley, Pakistan): Negative  $\delta^{18}\text{O}$  values from a high latitude protolith reset by Himalayan metamorphism. *Lithos*, 208, 471–483.
- Spruzeniece, L., & Piazzolo, S. (2015). Strain localization in brittle-ductile shear zones: fluid-abundant vs. fluid-limited conditions (an example from Wyangala area,

Australia). *Solid Earth*, 6(3), 881.

Stenvall, C. A., Fagereng, Å., & Diener, J. F. (2019). Weaker than weakest: on the strength of shear zones. *Geophysical Research Letters*, 46(13), 7404–7413.
