# Supplementary material for: Sources and Effects of Fluids in Continental Retrograde Shear Zones: Insights from the Kuckaus Mylonite Zone, Namibia
Source: Hindawi journal article supplement (doi:10.1155/2020/3023268), 2020-08-01
Supplement: f1 [file 3023268.f1.zip › Table_S4_Stenvall_et_al_(2019)_Geofluids.xlsx]

## Sheet: Sheet1
Table S4
Whole-rock δ18O values of gneiss from some previous studies
Paper	Location	Rocktype	δ18O (whole-rock)	Protolith/Mineralogy	Peak metamorphism (ºC, MPa)	Part of sample set deformed/altered	T and P of deformation/retrogression (ºC, Mpa)	Inferred meteoric fluid interaction
Beckinsale et al (1984)	Mona Complex North Wales	Paragneiss	9.4 - 13.3	Qtz, Pl, Ms, Bt, Ep, Chl, Grt, Cal, Ox	-	-	-	-
Cartwright and Barnicoat (2003)	Western Alps	Orthogneiss	8.6 - 9.2	Qtz, Ms, Pl, Kfsp, Bt, Grt	-	-	-	-
"	"	"	8.6 - 13.3	Qtz, Ms, Chl, Kfsp, Pl	-	yes	Greenschist facies	-
Cartwrigth and Buick (1999)	Reynolds Range, Australia	Orthogneiss	6.2 - 9.5	Kfsp, Pl, Qtz, Bt	Upper amphibolite- to granulite facies	-	-	-
"	"	"	0.0 - 1.0	" + Chl, Bt, Ms	"	yes	425 - 535, 400-650	yes
"	"	Paragneiss	6.5 - 8.5	Kfsp, Bt bearing metasediments	"	-	-	-
"	"	"	0.9 - 4.4	" + Ms	"	yes	550 - 600, 500-600	yes
Cartwright et al. (1993)	Adirondack Mountains, USA	Orthogneiss	4.0 - 10.3	Qtz, Fsp, Hbl, Au, Opx, Op	625 - 725, 700	-	-	yes
"	"	"	7.8 - 13.3	" + Bt	"	yes	450 - 550, <700	-
Curtis et al (2013)	Koegel Fontein, South Africa	Orthogneiss	-2.8 - 9.6	Qtz, Kfsp, Pl, Bt, Hbl, Op, Zrn, Ap ,Chl	-	yes	-	yes
Eiler and Valley (1994)	Adirondack Mountains, USA	Orthogneiss	6.5 - 12.1	Fayalite-, Pyroxene-, Hornblende- Bt-, Leuco-granitic gneiss	675 - 800, 700 - 800	-	-	yes
Fagereng et al. (2008)	Vredefort dome, South Africa	Orthogneiss	8.4 - 11.5	Qtz, Kfsp, Pl, Bt, Op, Chl, Ms	Upper amphibolite- to granulite facies	-	Greenschist - amphibolite facies	yes
Khan et al. (2019)	Himalayas, Pakistan	Orthogneiss	8.6 - 9.5	Kfsp,Qtz,Pl,Bt,Grt, Ep, Ttn,Zrn, Op	-	-	-	-
Lackey et al. 2005	Tehachapi Mountains, USA	Orthogneiss	7.0 - 11.0	Tonalitic and dioritic gneisses	Granulite facies	yes	-	-
Longstaffe and Schwarcz (1977)	NW Ontario, Canada	(Pakwash) Paragneiss	8.8 - 11.7	Pl, Qtz, Bt, Gt layered metagreywacke	Amphibolite facies	-	-	-
"	"	(Twilight) Paragneiss	7.3 - 9.3	Greywackes	Granulite facies	-	-	-
"	"	(Clay Lake) Orthogneiss	7.0 - 9.0	Enderbite and alaskite	"	-	-	-
"	"	(Cedar Lake) Orthogneiss	7.4 - 8.7	Granitoid gneiss	Amphibolite facies	-	-	-
"	"	(Footprint) Orthogneiss	5.0 - 8.9	Granitic mobilisate, tonalitic-, trondhjemitic-, granodioritic gneiss	Middle to upper amphibolite facies	-	-	-
McCaig et al. (1990)	Pyrenees, France	Orthogneiss	11.0 - 12.0	Qtz, K-fsp, Pl, Bt, Grt, Zrn, Ap	Amphibolite facies	-	-	-
"	"	"	5.0 - 9.0	" + Chl, Bt, Ms	"	yes	400 - 450	yes
Prame and Pohl (1994)	SW Sri Lanka	Paragneiss	9.0 - 12.9	Pelites and Psammites	Granulite facies	-	-	-
Prochaska (1992)	Eastern Alps	"	5.9 - 9.4	Kfsp, Pl, Bt, Ap, Zrn, Ms, Chl	Upper amphibolite facies	yes	480, 400 - 500	-
Read and Cartwright (2000)	Reynolds Range, Australia	Orthogneiss	~ 6 (ave.)	Qtz, Kfsp, Pl, Bt, Ox	"	-	-	-
"	"	"	1.4 - 6.7	Qtz, Kfsp, Pl, Ms, Bt, Chl	"	yes	Greenschist facies	yes
Rehman et al. (2014)	Himalayas, Pakistan	Paragneiss	3.0 - 4.6	Pl, Qtz, Zo, Aln, Bt, Ph, Grt, Ttn, Zrn	768, 2700	yes	-	yes
Stenvall et al. (2019)(this paper)	Kuckaus Mylonite Zone, Namibia	(Bt gneiss) Orthogneiss	7.1 - 10.0	Kfsp, Pl, Qtz, Bt	825, 550	yes	450 - 480, 270 - 420	yes
"	"	(Tsirub) Orthogneiss	8.9 - 13.1	Kfsp, Pl, Qtz, Bt, Hbl, Grt	"	yes	"	yes
							\
		Paragneiss:	6.5 - 13.3
		Altered:	0.9 - 4.6
		Orthogneiss:	5.0 - 12.0
		Altered:	-2.8 - 13.3
